# Supplementary material for: Gastroprotective effects of ginsenoside Rh4 against ethanol-induced gastric mucosal injury by inhibiting the MAPK/NF-κB signaling pathway
Source: Royal Society of Chemistry journal article supplement (doi:10.1039/d2fo03693b), 2023-01-01
Supplement: d2fo03693b1.pdf [file d2fo03693b1.pdf]

## Supporting Information

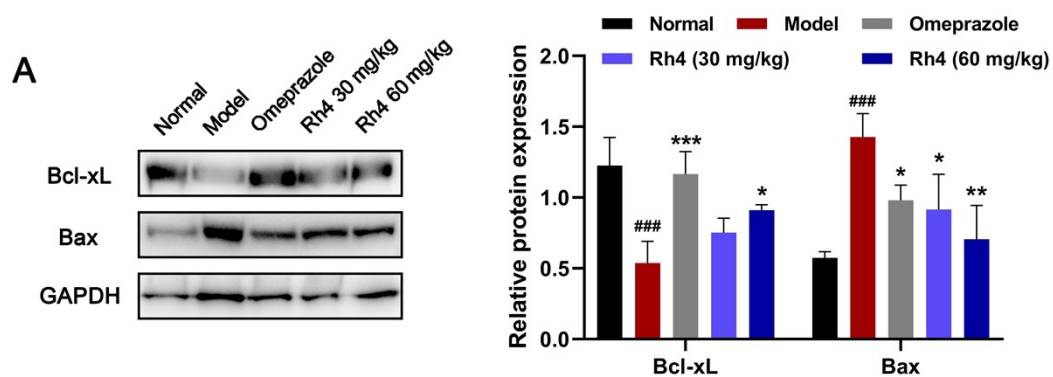

**Figure S1 The effect of ginsenoside Rh4 on the expression of Bcl-xL and Bax in gastric tissue.** Western blot showing the protein expression of Bcl-xL and Bax. GAPDH was used as the loading control and for band density normalization. The results are expressed as means  $\pm$  SD;  $n = 5$ ; # $P < 0.05$ , ## $P < 0.01$ , ### $P < 0.001$  compared with the normal group; \* $P < 0.05$ , \*\* $P < 0.01$ , \*\*\* $P < 0.001$  compared with the model group.

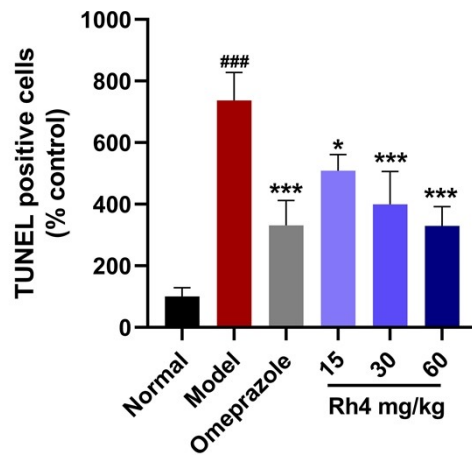

**Figure S2 Quantification of TUNEL-positive cell density in the in gastric tissues.** The results are expressed as means  $\pm$  SD;  $n = 5$ ; # $P < 0.05$ , ## $P < 0.01$ , ### $P < 0.001$  compared with the normal group; \* $P < 0.05$ , \*\* $P < 0.01$ , \*\*\* $P < 0.001$  compared with the model group.
